# Supplementary material for: Rationalisation of the Differences between APOBEC3G Structures from Crystallography and NMR Studies by Molecular Dynamics Simulations
Source: PubMed Central journal article supplement (PMC2902501; doi:10.1371/journal.pone.0011515), 2010-07-12
Supplement: pone.0011515.s006.pdf [file pone.0011515.s006.pdf]

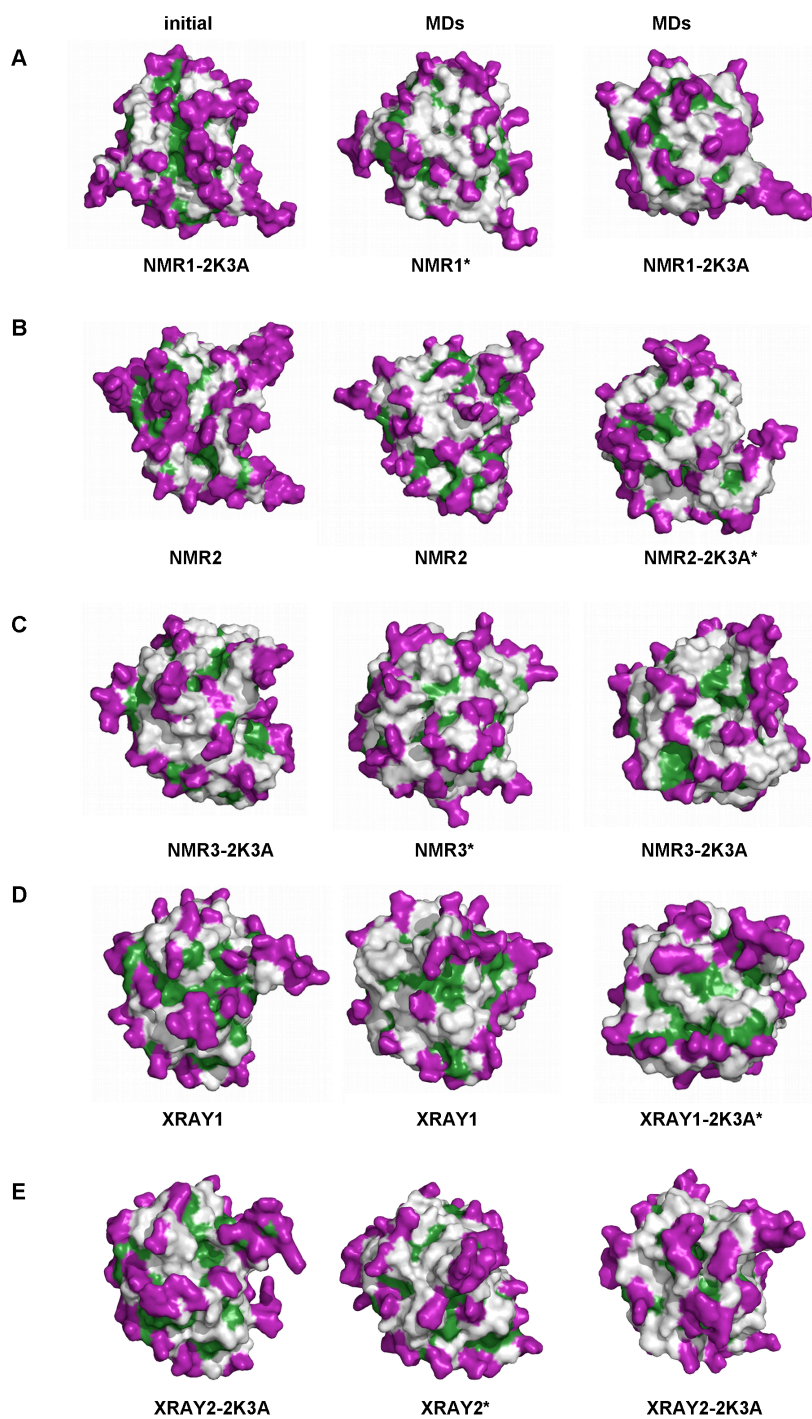

**Figure S6. Exposed surface area of the A3G C-CDA.** Comparison of the exposed surface area of starting structures with the representative structures from the clustering analysis of MD simulations. Residues indicated in purple have a SASA value greater than 90 Å<sup>2</sup> and those indicated in green have a SASA value lower than 40 Å<sup>2</sup>. SASA values were calculated with the POPS program. (A) NMR1-2K3A; (B) NMR2; (C) NMR3-2K3A; (D) XRAY1 and (E) XRAY2-2K3A.
