# Supplementary material for: Rationalisation of the Differences between APOBEC3G Structures from Crystallography and NMR Studies by Molecular Dynamics Simulations
Source: PLOS journal article supplement (doi:10.1371/journal.pone.0011515), 2010-07-12
Supplement: S2 (10.1371/journal.pone.0011515.s002) [file journal.pone.0011515.s002]

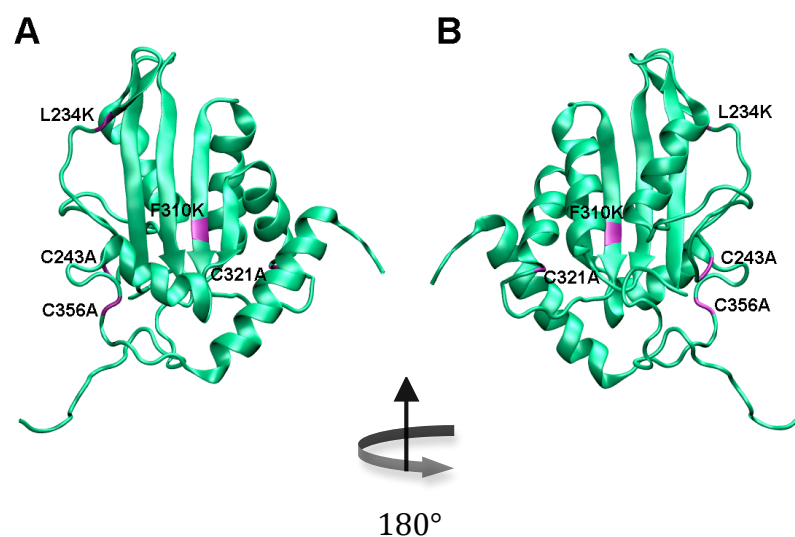

**Figure S2. Positions of solubility enhancing mutations in A3G-2K3A.** (A) A ribbon model of the NMR1-2K3A structure (PDB code 2JYW) is shown with the positions of the five solubility enhancing mutations shown in magenta. The same structure is shown in (B) after rotation by 180°.
